# Supplementary material for: Developmental expression profile of the yy2 gene in mice
Source: PubMed Central journal article supplement (PMC2724487; doi:10.1186/1471-213x-9-45), 2009-07-28
Supplement: 1471-213X-9-45-S1.pdf [file 1471-213X-9-45-S1.pdf]

Ladder

Neurons

Microglia

Astrocytes

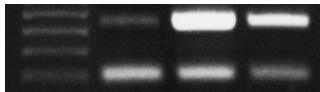

← *yy2*

←  $\beta$ -actin

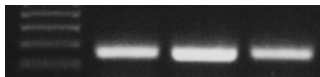

← *mbtps2*

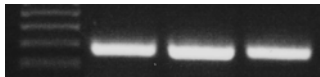

← *yy1*
