# Supplementary material for: Developmental expression profile of the yy2 gene in mice
Source: PubMed Central journal article supplement (PMC2724487; doi:10.1186/1471-213x-9-45), 2009-07-28
Supplement: 1471-213X-9-45-S2.pdf [file 1471-213X-9-45-S2.pdf]

Testis

Liver

Kidney

Thymus

Spleen

Ladder

E16

P10

P30

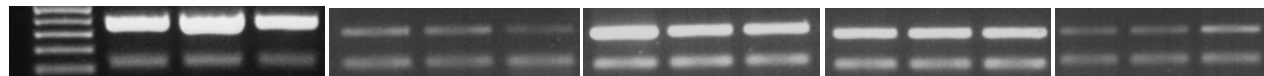

← *yy2*  
←  $\beta$ -actin

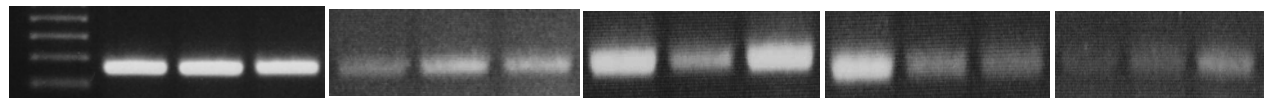

← *mbtps2*

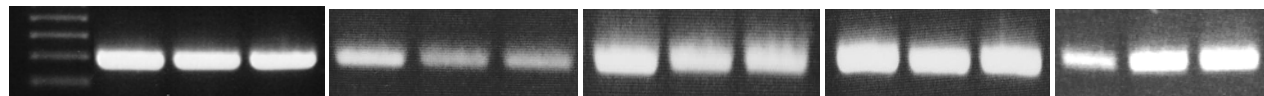

← *yy1*
