# Supplementary material for: Developmental expression profile of the yy2 gene in mice
Source: PubMed Central journal article supplement (PMC2724487; doi:10.1186/1471-213x-9-45), 2009-07-28
Supplement: 1471-213X-9-45-S3.pdf [file 1471-213X-9-45-S3.pdf]

|            | <i>Tuj-1</i> ± SD | <i>Iba-1</i> ± SD | <i>GFAP</i> ± SD  |
|------------|-------------------|-------------------|-------------------|
| Neurons    | 0,24728 ± 0,03513 | 0,00002 ± 0,00001 | 0,03323 ± 0,00548 |
| Microglia  | 0,00072 ± 0,00025 | 0,04826 ± 0,01443 | 0,03788 ± 0,04975 |
| Astrocytes | 0,00101 ± 0,00061 | 0,00549 ± 0,00411 | 0,90779 ± 0,19163 |
